# Supplementary material for: Tracking side reactions of the inverse vulcanization process and developing monomer selection guidelines
Source: Royal Society of Chemistry journal article supplement (doi:10.1039/d2py00774f), 2022-01-01
Supplement: d2py00774f1.pdf [file d2py00774f1.pdf]

Electronic Supplementary Information (ESI) for Polymer Chemistry. This journal is ©  
The Royal Society of Chemistry 2022

Electronic Supplementary Information (ESI) for:

Tracking side reactions of the inverse vulcanization process and developing monomer selection  
guidelines

Yusuke Onose,<sup>a</sup> Yuri Ito,<sup>a</sup> Junpei Kuwabara <sup>\*a</sup> and Takaki Kanbara <sup>\*a</sup>

a. Tsukuba Research Center for Energy Materials Science (TREMS), Graduate School of Pure  
and Applied Sciences, University of Tsukuba, 1-1-1 Tennodai, Tsukuba, Ibaraki 305-8573, Japan. E-  
mail: [kanbara@ims.tsukuba.ac.jp](mailto:kanbara@ims.tsukuba.ac.jp), [kuwabara@ims.tsukuba.ac.jp](mailto:kuwabara@ims.tsukuba.ac.jp)

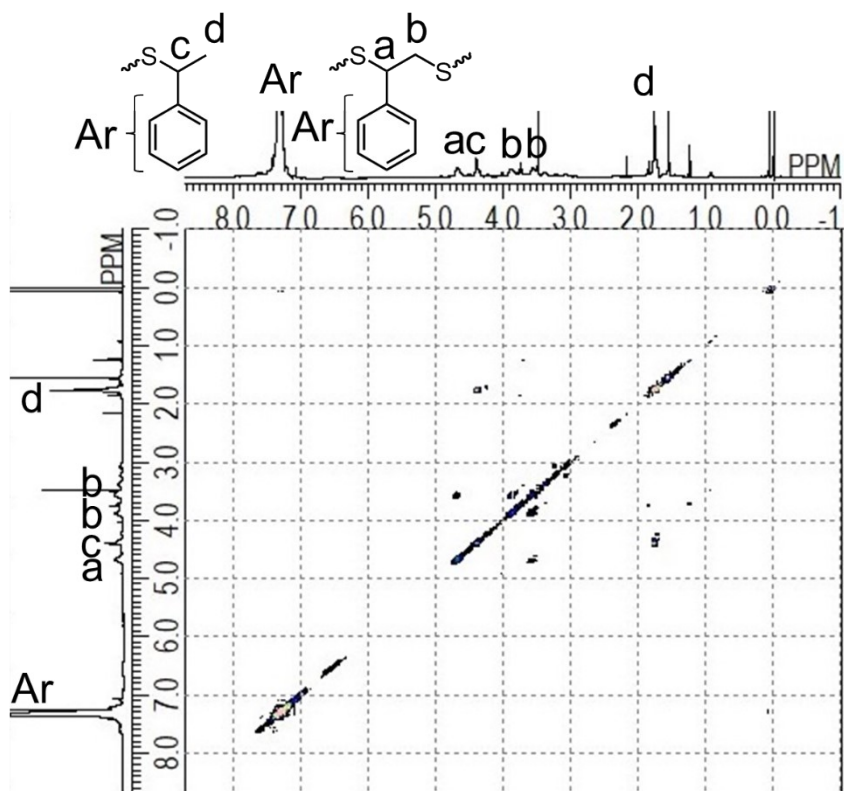

Figure S1. H-H COSY spectrum of Polymer B (400 MHz, CDCl<sub>3</sub>, r.t.).

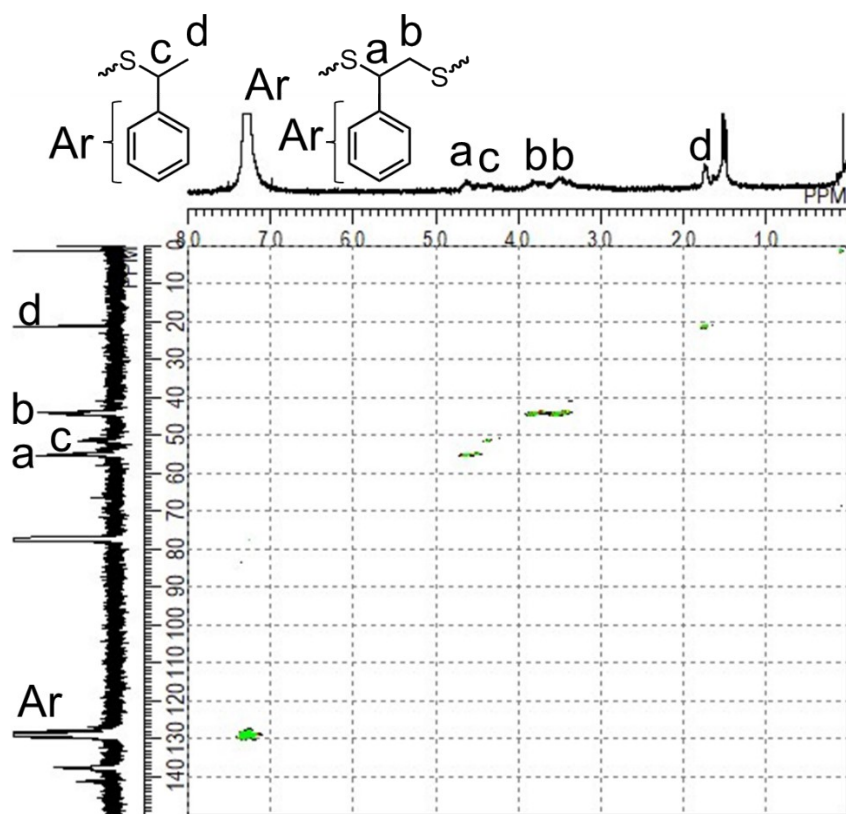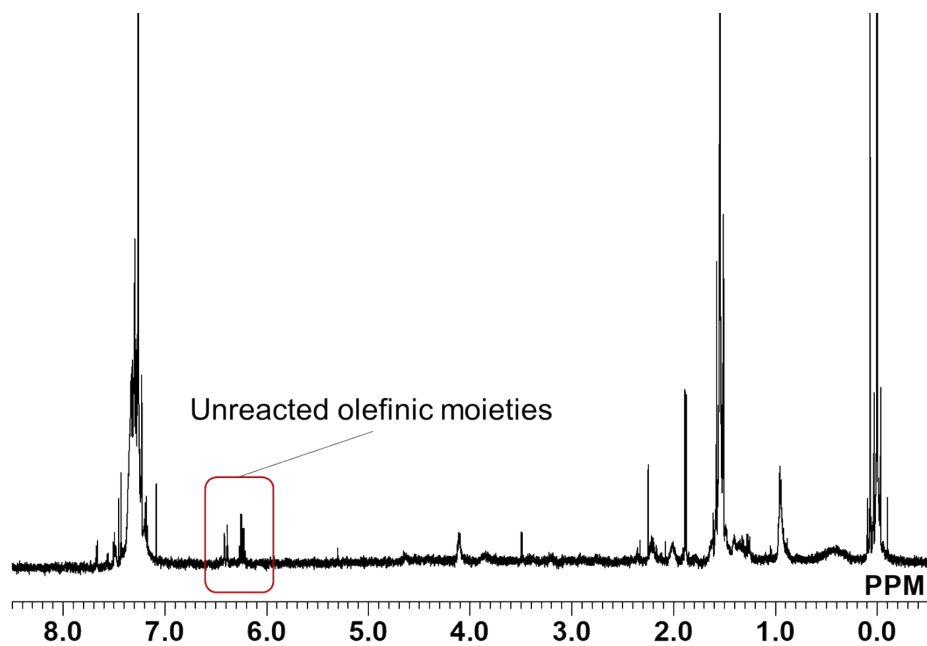

Figure S3. <sup>1</sup>H NMR spectrum of the crude product of the reaction of monomer D with S<sub>8</sub> (400 MHz, CDCl<sub>3</sub>, r.t.).

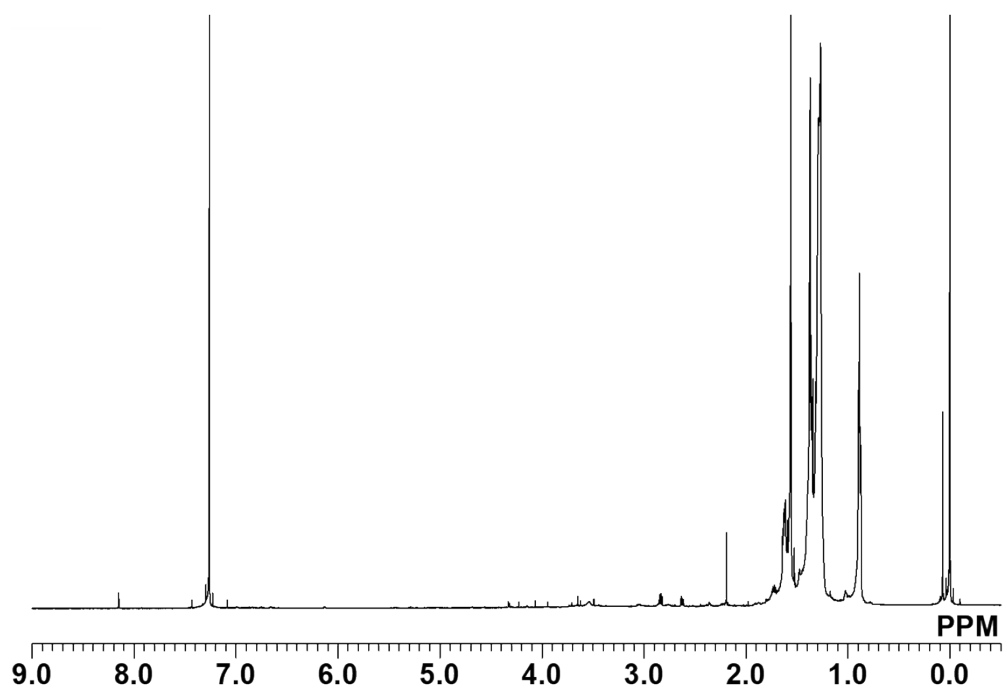

**Figure S4.** <sup>1</sup>H NMR spectrum of the crude product of the reaction of monomer E with S<sub>8</sub>  
(400 MHz, CDCl<sub>3</sub>, r.t.).

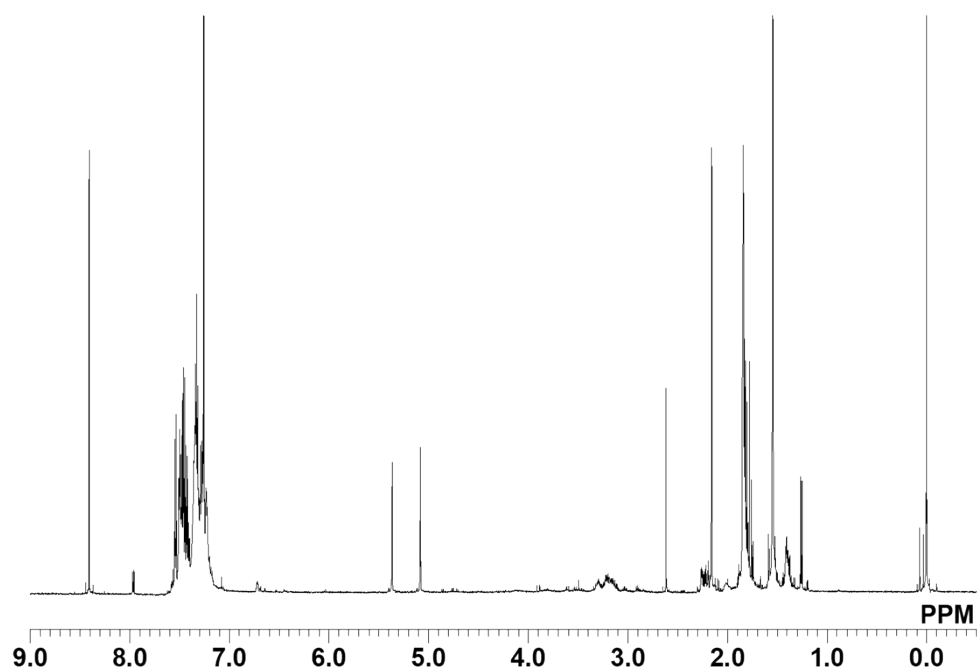

**Figure S5.** <sup>1</sup>H NMR spectrum of the crude product of the reaction of monomer F with S<sub>8</sub>  
(400 MHz, CDCl<sub>3</sub>, r.t.).

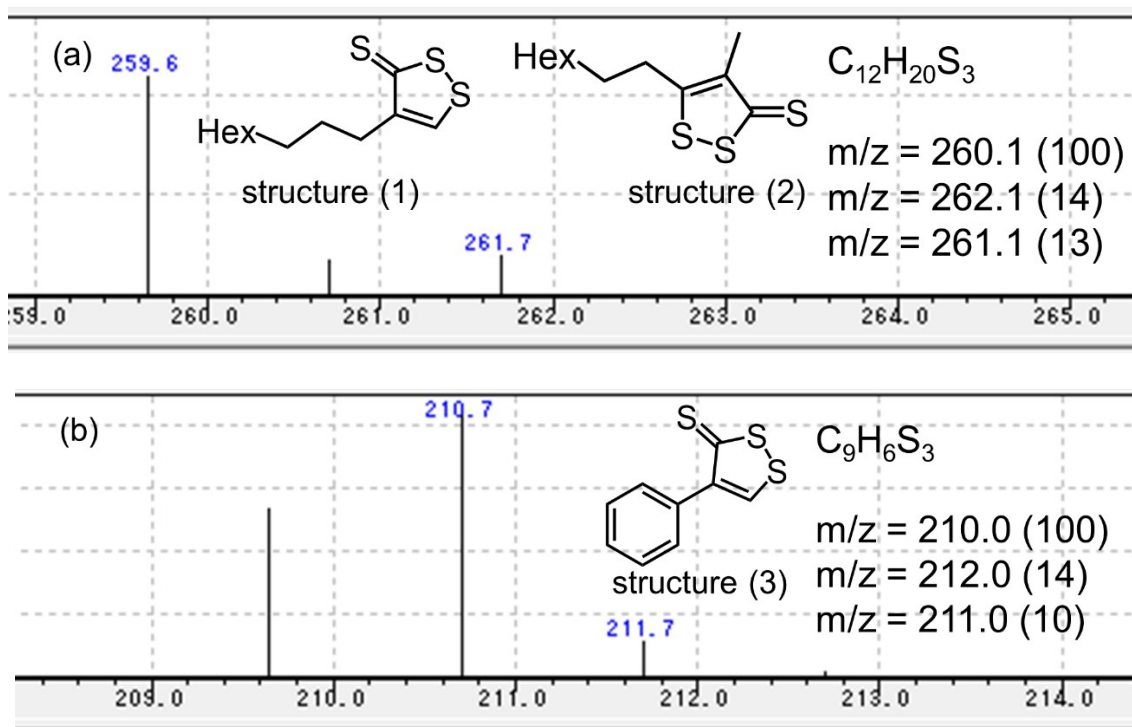

Figure S6. (a)GC-MS spectra of structure (1) and (2), (b) GC-MS spectrum of structure (3).
